# Supplementary material
Source: publisher figshare collection journal article supplement (https://karger.figshare.com/ndownloader/files/38902494)

**Supplementary Table 1:** CFQ (Chewing Function Questionnaire)

| Q1 | Have you had any difficulty chewing apples / raw carrots, or food of similar consistency/ Da li ste imali poteškoće prilikom žvakanja jabuke / sirove šargarepe ili hrane slične konzistencije? |
| --- | --- |
| Q2 | Have you had any difficulty chewing bacon / smoked ham /baked or fried firm meat, or food of similar consistency? / Da li ste imali poteškoće prilikom žvakanja slanine / pršuta / pečenog ili prženog tvrđeg mesa ili hrane slične konzistencije? |
| Q3 | Have you had any difficulties chewing biscuits / crackers / tea biscuits or food of similar consistency? / Da li ste imali poteškoće prilikom žvakanja dvopeka / krekera / čajnih keksića ili hrane slične konzistencije? |
| Q4 | Have you had any difficulty chewing fresh bread /doughnut or food of similar consistency? / Da li ste imali poteškoće prilikom žvakanja svežeg hleba / krofne ili hrane slične konzistencije? |
| Q5 | Have you had any difficulty chewing nuts / walnuts / almonds / macadamia / peanuts or similar food? / Da li ste imali poteškoće prilikom žvakanja lešnika / oraha / badema / makadamija / kikirikija ili slične hrane? |
| Q6 | Have you had any difficulty chewing lettuce / raw cabbage or similar food? /  Da li ste imalipoteškoća prilikom žvakanja zelene salate / sirovog kupusa ili slične hrane? |
| Q7 | Have you felt insecure when you are chewing? / Da li ste osećali nesigurnost prilikom žvakanja? |
| Q8 | Have you had any difficulty when biting different food (food incision)? / Da li ste imali poteškoća prilikom odgrizanja hrane? |
| Q9 | Have you noticed food catching or food remaining sticked between or on your teeth or dentures during or after meals? / Da li ste primetili da Vam hrana zaostaje između zuba ili na protezama tokom ili posle obroka? |
| Q10 | Have you had any difficulty chewing chewing gum? / Da li ste imali poteškoće prilikom žvakanja žvakaće gume? |

**Supplementary Figure 1**. Example of colorimetric analysis of chewed gum photo in the “Viewgum" software.


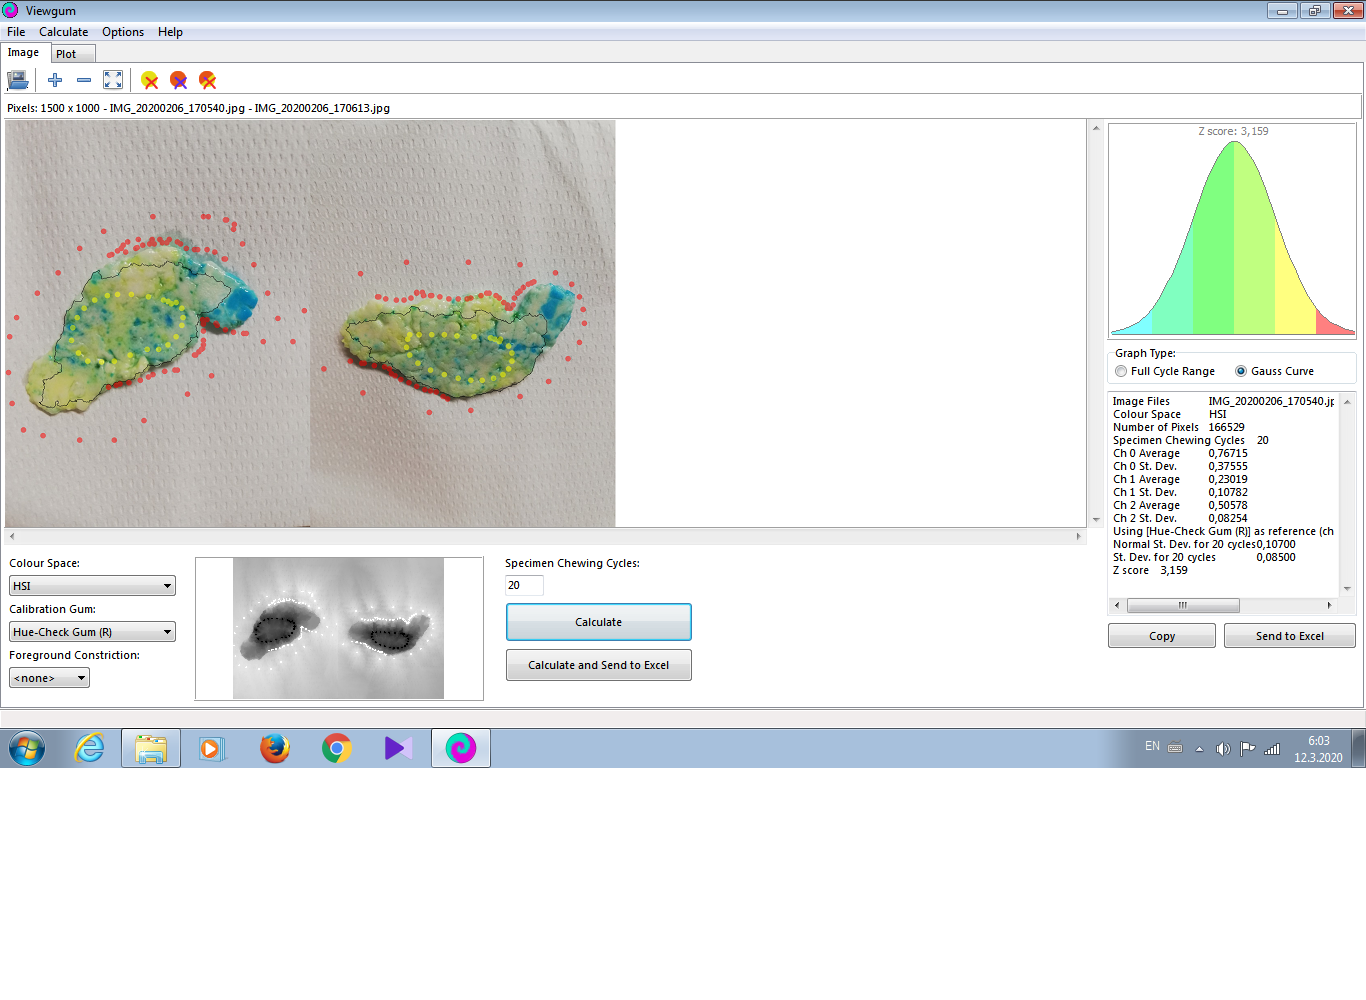

Supplement: Supplementary file 1 [file 38902494]
